# Supplementary material
Source: PubMed Central journal article supplement (PMC4418183)
Supplement: NIHMS677983-supplement-Related_Manuscript_File.pdf [file NIHMS677983-supplement-Related_Manuscript_File.pdf]

Advertisement

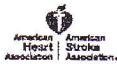

Positively Impact Patient Outcomes:  
Become an Author in an AHA Journal.

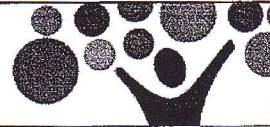

[DONATE](#) [HELP](#) [CONTACT AHA](#) [HOME](#)

# AHA Journals

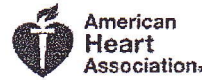

User Name   
Password

[Home](#) • [Subscriptions](#) • [Feedback](#) • [Help](#) • [Circulation Journals Home](#) • [AHA Journals Home](#)

Institution: University of Iowa-Iowa Search:  [Advanced Search](#)

## Acknowledgment Permission Form

Journal   
Manuscript No.   
First author   
Title of work

### Acknowledgment Permission:

Authors must provide written permission/approval from all individuals mentioned by name in the Acknowledgements section of a submitted manuscript. By signing this form, any and all acknowledged persons therefore state that they have read and approved the mention of their names in the Acknowledgment section of the aforementioned paper.

Printed Name   
Signature   
Date   
Printed Name   
Signature   
Date   
Printed Name   
Signature   
Date   
Printed Name   
Signature   
Date

**EPI | NPAM Abstracts**  
Now Available Online

Follow *Circulation's* blog—  
"OpenHeart"

Advertisement

An unusual cause of mineralo-corticoid hypertension  
[Play Video](#)  
  
A recording from Hypertension Clinical-Pathological Conference, University of Glasgow

[Alternate International Access](#)[more info]
