# Supplementary material
Source: PubMed Central journal article supplement (PMC4418183)

Supplemental Material

**Myeloperoxidase Is Increased in Human Cerebral Aneurysms and Increases  
Formation and Rupture of Cerebral Aneurysms in Mice**

Chu et al.

Contents

- 1) Supplemental Table I
- 2) Supplemental Figures I & II

**Supplemental Table I: TaqMan Primers/probes used in the study**

| Gene                 | Catalog Number     | Company                     |
|----------------------|--------------------|-----------------------------|
| Mouse:               |                    |                             |
| TNF $\alpha$         | Mm99999068_m1      | Life Technologies           |
| COX2                 | Mm00478374_m1      | Life Technologies           |
| CXCL1                | Mm.PT.58.42076891  | Integrated DNA Technologies |
| MMP8                 | Mm.PT.58.6942600   | Integrated DNA Technologies |
| CD68                 | Mm03047343_m1      | Life Technologies           |
| $\alpha$ SMA         | Mm01546133_m1      | Life Technologies           |
| MMP3                 | Mm00440295_m1      | Life Technologies           |
| MMP9                 | Mm.PT.58.10100097  | Integrated DNA Technologies |
| MMP13                | Mm01168713_m1      | Life Technologies           |
| $\beta$ -actin (VIC) | 4352341E           | Life Technologies           |
| Human:               |                    |                             |
| VCAM1                | Hs.PT.56a.38466338 | Integrated DNA Technologies |
| ICAM1                | Hs.PT.56a.4746364  | Integrated DNA Technologies |
| SOD2 (MnSOD)         | Hs00167309_m1      | Life Technologies           |
| NOX4                 | Hs00418356_m1      | Life Technologies           |
| $\beta$ -actin (HEX) | Hs.PT.39a.22214847 | Integrated DNA Technologies |

**Supplemental Figure I.** Systolic blood pressure was measured at baseline and weekly following induction of aneurysm and mini-pump implantation. Pressures were significantly elevated after mini-pump implantation. There was no significant difference in blood pressure between MPO KO and wild type controls at any time point.

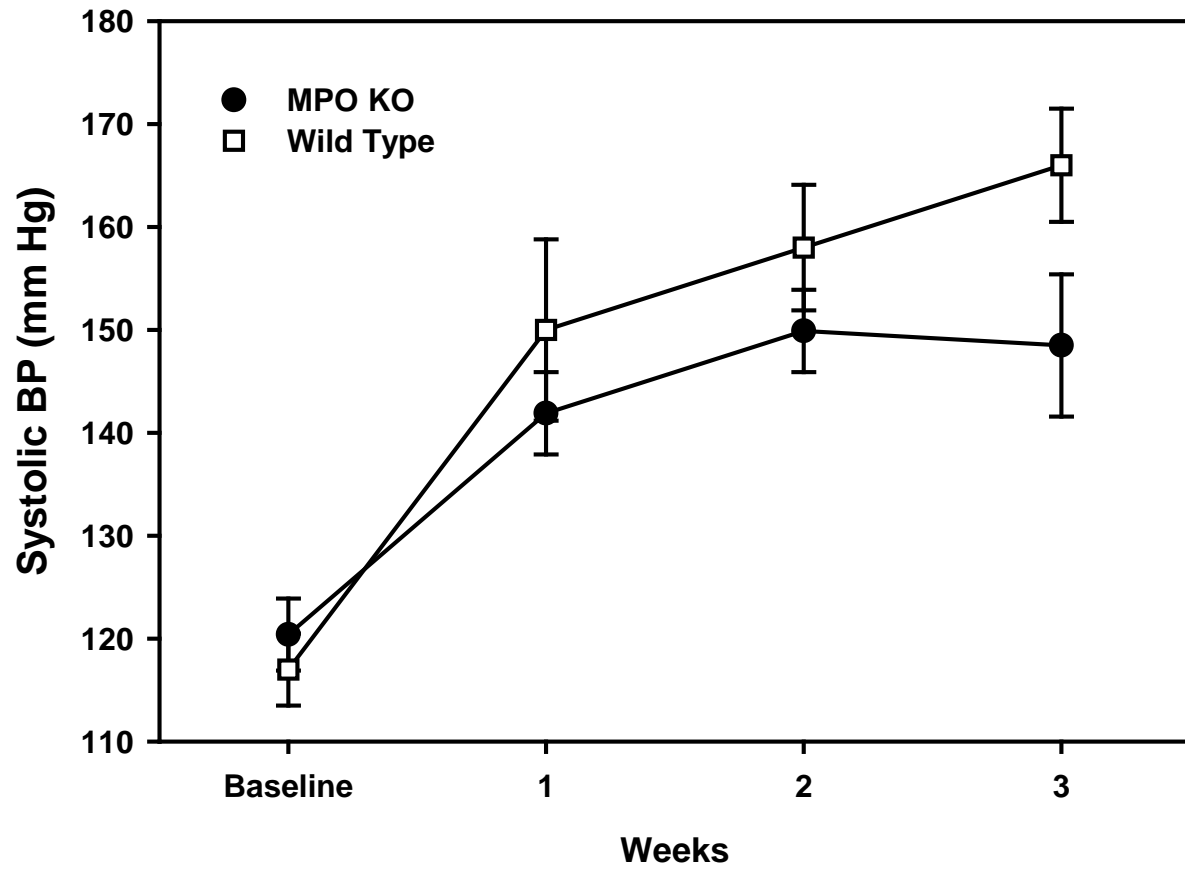

**Supplemental Figure II.** Expression of MMP9, MMP3, and MMP13 in cerebral arteries of WT and MPO KO mice 17-19 days after CA induction. mRNA levels were quantified using TaqMan  $\Delta\Delta C_t$  method, with normalization to  $\beta$ -actin in the same reaction. \* =  $p < 0.05$  vs. WT

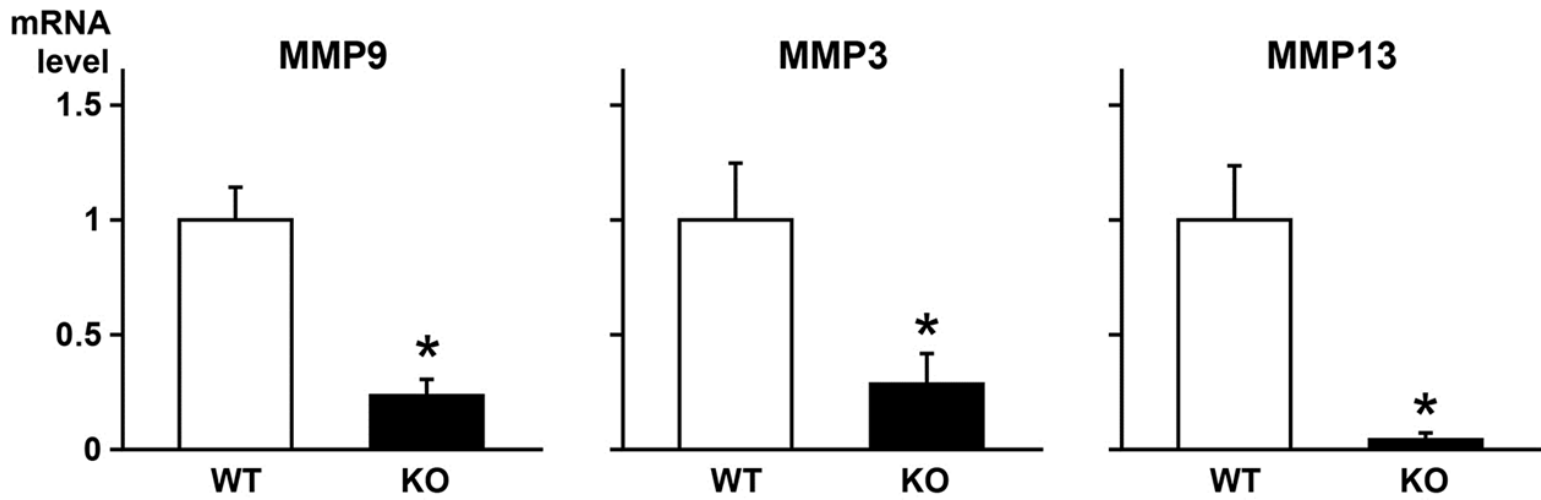

Supplement: NIHMS677983-supplement-Supplemental_Material.pdf [file NIHMS677983-supplement-Supplemental_Material.pdf]
